# Supplementary material for: Preserved C-peptide secretion is associated with fewer low-glucose events and lower glucose variability on flash glucose monitoring in adults with type 1 diabetes
Source: PubMed Central journal article supplement (PMC7145780; doi:10.1007/s00125-020-05099-3), 2020-02-07

**ESM figure 1a: Correlation between CV glucose and C-peptide**

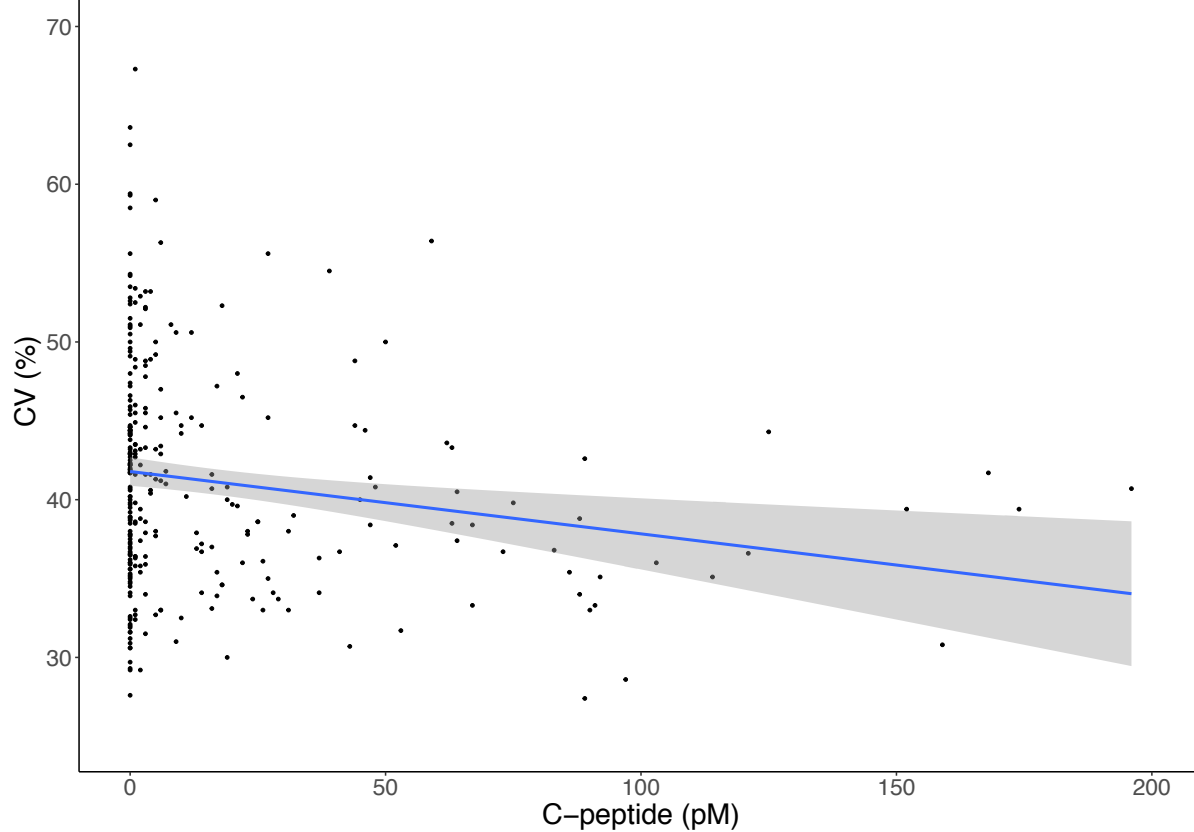

**ESM figure 1b: Correlation between % below 3.9mM and C-peptide**

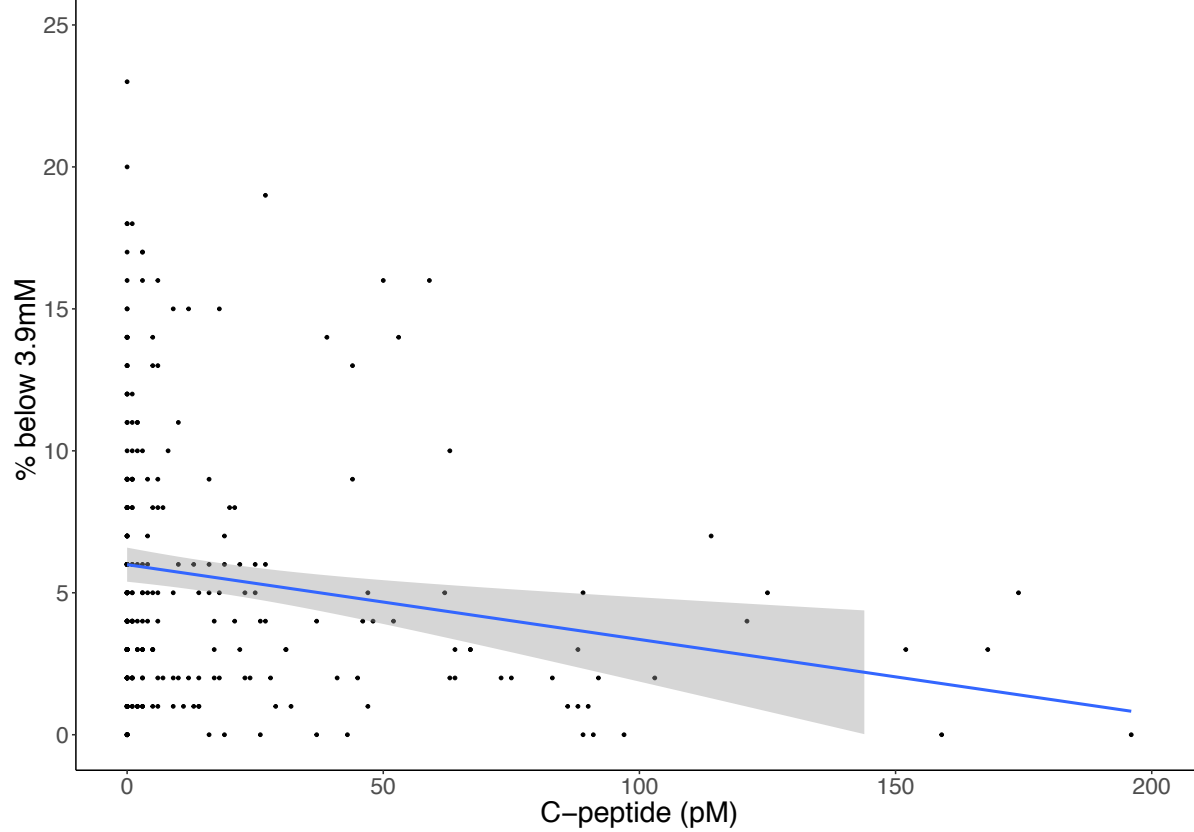

ESM figure 1c: Correlation between low glucose events and C-peptide

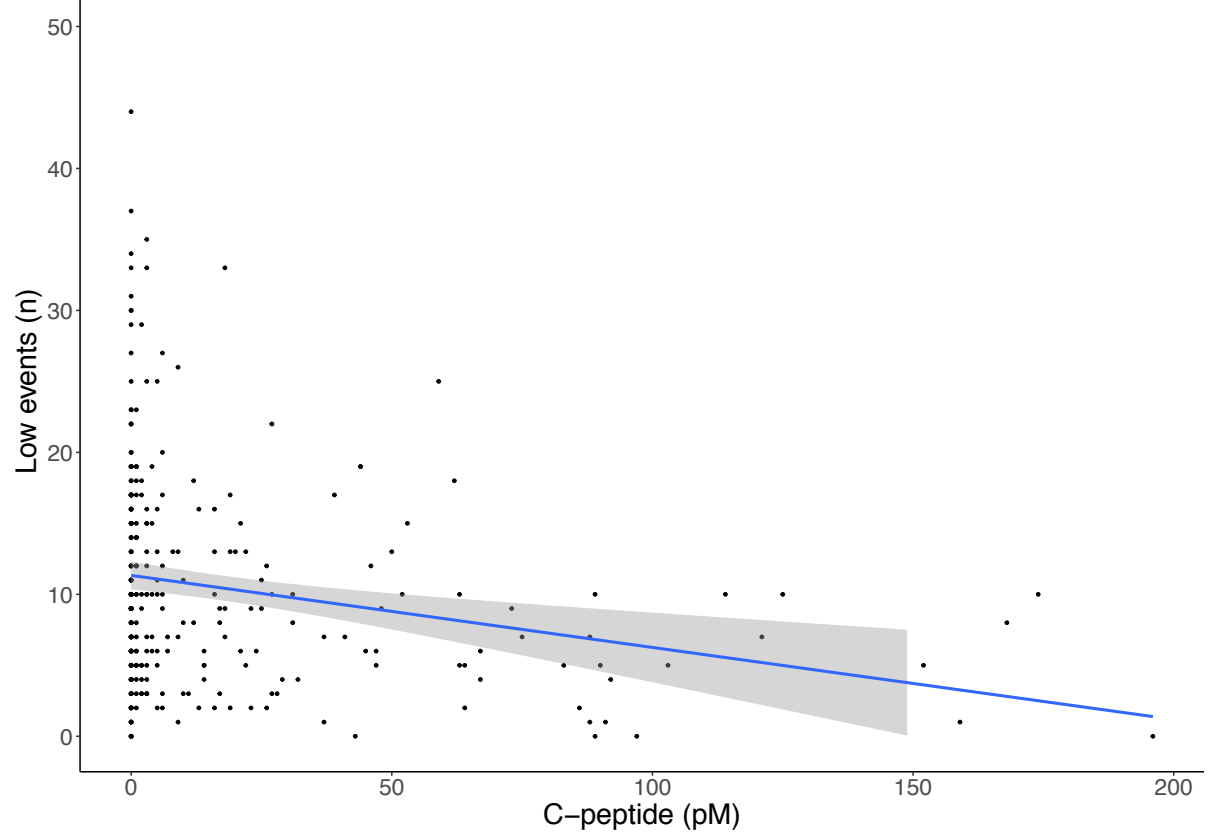

Supplement: 125_2020_5099_MOESM1_ESM.pdf [file 125_2020_5099_MOESM1_ESM.pdf]
